# Supplementary material for: Mechanism of Salt Tolerance and Plant Growth Promotion in Priestia megaterium ZS-3 Revealed by Cellular Metabolism and Whole-Genome Studies
Source: MDPI journal article supplement (doi:10.3390/ijms242115751), 2023-10-30
Supplement: s1 [file s1]

Supplementary Material

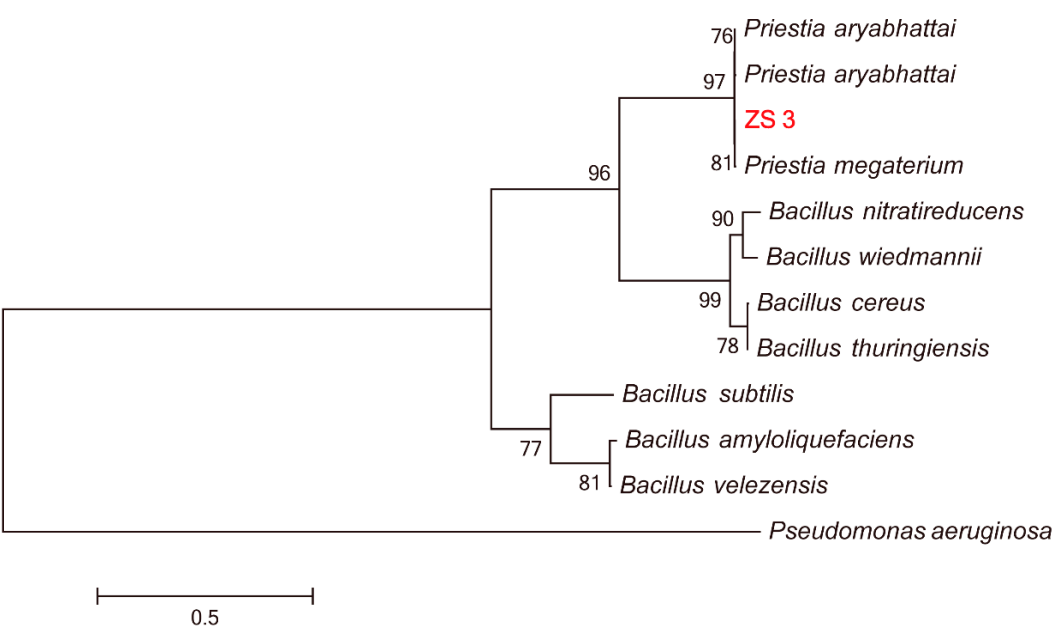

**Figure S1** Maximum likelihood (ML) phylogenetic tree generated from analysis of a combined 16s and gyrB sequences dataset. *Pseudomonas aeruginosa* is the outgroup taxa.

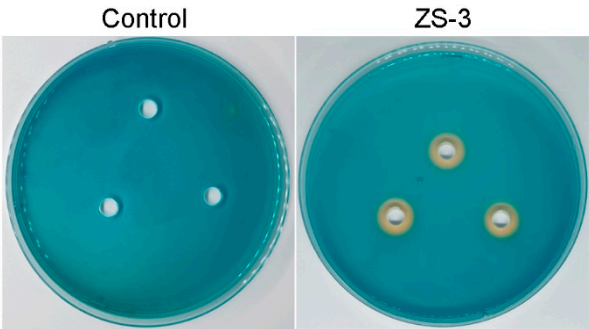

**Figure S2** The ability of *P. megaterium* ZS-3 to secrete siderophores was detected in CAS medium.

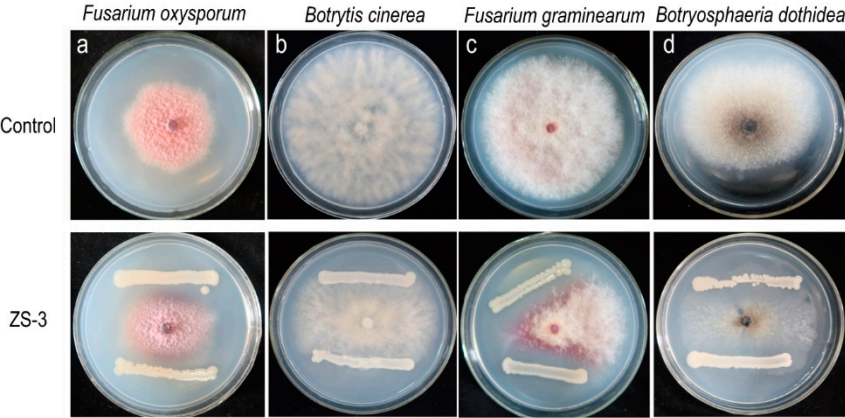

**Figure S3** Effect of antagonistic cultures of *P. megaterium* ZS-3 with the following

pathogens: a. *F. oxysporum*; b. *B. cinerea*; c. *F. graminearum*; d. *Botryosphaeria dothidea*. The control group was a single inoculated treatment with the pathogen and the others were antagonistic cultures of ZS-3 with the pathogen.

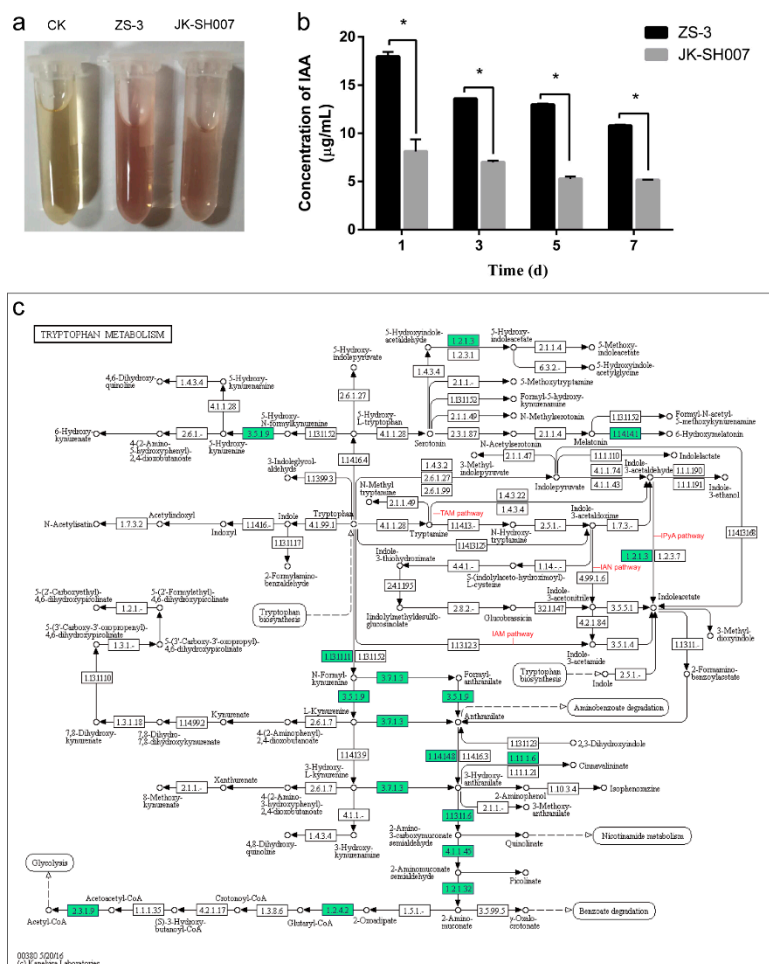

**Figure S4** Analysis of the IAA secretion and KEGG synthesis pathways. Colour development reaction (a) and quantitative analysis (b) of Salkowski's reagent mixed with ZS-3 and JK-SH007 cell supernatants. CK is TSB medium without bacteria inoculation. Putative "KEGG pathway" of trp metabolism and IAA biosynthetic pathways in the *P. megaterium* ZS-3. The numbers in the boxes represent the EC numbers of key enzymes in the metabolic pathway, and the green boxes indicate the presence of genes corresponding to the relevant enzymes in the genome. Values represent the means of three biological experiments, each in three technical replicates. Error bars represent SE. Asterisks on the bars indicate significant differences between the treatments analysed according to the t test ( $P < 0.05$ ).

**Table S1- Genes involved in osmotic stress tolerance.**

| Gene ID                                                  | Gene         | Annotation                                                         | EC numbers      | Pathway                                            |
|----------------------------------------------------------|--------------|--------------------------------------------------------------------|-----------------|----------------------------------------------------|
| GE004605                                                 | <i>rocD-</i> | Ornithine--oxo-acid transaminase                                   | EC:2.6.1.1<br>3 | Arginine and proline metabolism                    |
| GE000066<br>GE002967                                     | <i>proA</i>  | Glutamate-5-semialdehyde dehydrogenase                             | EC:<br>1.2.1.41 | Proline biosynthesis                               |
| GE000065<br>GE002968                                     | <i>proB</i>  | Glutamate 5-kinase                                                 | EC:<br>2.7.2.11 |                                                    |
| GE002969<br>GE003249<br>GE000862                         | <i>proC</i>  | Pyrroline-5-carboxylate reductase                                  | EC:1.5.1.2      |                                                    |
| GE000222<br>GE000297<br>GE000298<br>GE001454             | <i>proDH</i> | Proline dehydrogenase                                              | EC:<br>1.5.5.2  |                                                    |
| GE003159                                                 | <i>gltB</i>  | Glutamate synthase [NADPH] small chain                             | EC:1.4.1.1<br>3 | Glutamate biosynthesis                             |
| GE003158                                                 | <i>gltD</i>  | Glutamate synthase [NADPH] large chain                             | EC:<br>1.4.1.13 |                                                    |
| GE001177                                                 | <i>glnA</i>  | Glutamine synthetase                                               | EC:6.3.1.2      | Glutamine biosynthesis                             |
| GE003736                                                 | <i>opuAC</i> | Glycine betaine/proline transport system substrate-binding protein | --              | Glycine betaine/proline transport and biosynthesis |
| GE003737                                                 | <i>proW</i>  | Glycine betaine/proline transport system permease protein          | --              |                                                    |
| GE003738                                                 | <i>opuAA</i> | Glycine betaine/proline transport system ATP-binding protein       | EC:7.6.2.9      |                                                    |
| GE003739                                                 |              | Glycine betaine catabolism A                                       | --              |                                                    |
| GE003927<br>GE003928                                     | <i>opuD</i>  | Glycine betaine transporter OpuD                                   | --              |                                                    |
| GE000200<br>GE002996<br>GE004398                         | <i>betB</i>  | Betaine-aldehyde dehydrogenase                                     | EC:1.2.1.8      |                                                    |
| GE000199                                                 | <i>gbsB</i>  | Choline dehydrogenase                                              | EC:1.1.1.1      | Trehalose biosynthesis                             |
| GE001261                                                 | <i>ptbA</i>  | PTS glucose transporter subunit IIA                                | EC:2.7.1.-      |                                                    |
| GE004306                                                 | <i>treC</i>  | Trehalose-6-phosphate hydrolase                                    | EC:3.2.1.9<br>3 |                                                    |
| GE001851<br>GE001950<br>GE002623<br>GE004211<br>GE004788 | <i>gltP</i>  | Proton glutamate symport protein                                   | --              | Glutamate transport                                |
| GE003524<br>GE004532                                     |              | Na(+)/H(+) antiporter NhaS5                                        |                 | Sodium and chloride transporters                   |
| GE004011                                                 | <i>NhaC</i>  | Na(+)/H(+) antiporter NhaC                                         |                 |                                                    |
| GE004063                                                 | <i>natB</i>  | Sodium transport system permease protein                           | --              |                                                    |
| GE004064                                                 | <i>natA</i>  | Sodium transport system ATP-binding protein                        | EC:7.2.2.4      |                                                    |
| GE000370                                                 | <i>mnhA</i>  | Multicomponent Na+:H+ antiporter subunit A                         | --              |                                                    |
| GE000369                                                 | <i>mnhB</i>  | Multicomponent Na+:H+ antiporter subunit B                         | --              |                                                    |
| GE000368                                                 | <i>mnhC</i>  | Multicomponent Na+:H+ antiporter subunit C                         | --              |                                                    |
| GE000367                                                 | <i>mnhD</i>  | Multicomponent Na+:H+ antiporter subunit D                         | --              |                                                    |
| GE000366                                                 | <i>mnhE</i>  | Multicomponent Na+:H+ antiporter subunit E                         | --              |                                                    |
| GE000365                                                 | <i>mnhF</i>  | Multicomponent Na+:H+ antiporter subunit F                         | --              |                                                    |
| GE000364                                                 | <i>mnhG</i>  | Multicomponent Na+:H+ antiporter subunit G                         | --              |                                                    |
| GE005122                                                 | <i>yfbS</i>  | Ca-activated chloride channel homolog                              | --              |                                                    |
| GE002415                                                 | <i>nhaK</i>  | Sodium, potassium, lithium and rubidium/H(+) antiporter            | --              |                                                    |
| GE001374<br>GE003450                                     | <i>ktrB</i>  | Ktr system potassium uptake protein B                              | --              | Low-affinity potassium transport system            |
| GE001373<br>GE003940                                     | <i>ktrC</i>  | Ktr system potassium uptake protein C                              | --              |                                                    |
| GE004044                                                 | <i>ktrD</i>  | Ktr system potassium uptake protein D                              | --              |                                                    |
| GE000117<br>GE003785<br>GE004546<br>GE004761             | <i>clsAB</i> | Cardiolipin synthase A/B                                           | EC:2.7.8.-      | Cardiolipin biosynthesis                           |
| GE001334<br>GE003236<br>GE004417                         | <i>ltaS</i>  | Lipoteichoic acid synthase                                         | EC:2.7.8.2<br>0 | Lipoteichoic acid biosynthesis                     |

|          |            |                       |    |                                   |
|----------|------------|-----------------------|----|-----------------------------------|
| GE003788 | <i>des</i> | Fatty acid desaturase | -- | Fatty acid membrane modifications |
|----------|------------|-----------------------|----|-----------------------------------|

**Table S2-** Genes involved in heavy metal transport and resistance.

| Gene ID  | Gene        | Annotation                                                    | EC numbers  | Pathway                          |
|----------|-------------|---------------------------------------------------------------|-------------|----------------------------------|
| GE000408 | <i>znuA</i> | Zinc transport system substrate-binding protein               | --          | Zinc transport                   |
| GE000750 |             | Zinc transport system ATP-binding protein                     | EC:7.2.2.-  |                                  |
| GE000751 |             | Zinc transport system permease protein                        | --          |                                  |
| GE003468 |             | Zinc transporter, ZIP family                                  | --          |                                  |
| GE003705 |             |                                                               |             |                                  |
| GE004018 |             |                                                               |             |                                  |
| GE004866 | <i>zitB</i> | Cobalt-zinc-cadmium efflux system protein                     | --          | Cobalt-zinc-cadmium transport    |
| GE001208 | <i>cutC</i> | Copper homeostasis protein cutC                               | --          | Copper resistance transport      |
| GE004500 |             |                                                               |             |                                  |
| GE002267 | <i>copD</i> | Copper resistance protein D                                   | --          |                                  |
| GE002266 | <i>copC</i> | Copper resistance protein C                                   | --          |                                  |
| GE003352 | --          | Copper-exporting P-type ATPase                                | --          |                                  |
| GE003353 | <i>copZ</i> | Copper chaperone CopZ                                         | --          | Arsenite transport and reduction |
| GE003342 | <i>arsB</i> | Arsenical pump membrane protein                               | --          |                                  |
| GE003529 |             |                                                               |             |                                  |
| GE004204 |             |                                                               |             |                                  |
| GE000303 | <i>arsC</i> | Arsenate reductase (glutaredoxin)                             | EC:1.20.4.1 |                                  |
| GE003530 |             | Arsenate reductase (thioredoxin)                              | EC:1.20.4.4 |                                  |
| GE002245 | <i>chrA</i> | Chromate transporter                                          | --          | Chromate reduction and transport |
| GE002246 |             |                                                               |             |                                  |
| GE002110 | <i>cadA</i> | Cadmium-transporting ATPase                                   | --          | Cadmium transport                |
| GE004869 |             |                                                               |             |                                  |
| GE002111 | <i>cadC</i> | Cadmium resistance transcriptional regulatory protein CadC    | --          |                                  |
| GE004866 | <i>czcD</i> | Cadmium, cobalt and zinc/H(+)-K(+) antiporter                 | --          | Manganese transport              |
| GE002726 | <i>mntH</i> | Manganese transport protein                                   | --          |                                  |
| GE000140 | <i>mntP</i> | Putative manganese efflux pump MntP                           | --          |                                  |
| GE004533 | <i>mgtE</i> | Magnesium transporter MgtE                                    | --          | Magnesium trasnport              |
| GE002360 | <i>corA</i> | Magnesium transporter                                         | --          |                                  |
| GE003322 |             |                                                               |             |                                  |
| GE004110 |             |                                                               |             |                                  |
| GE004533 |             |                                                               |             |                                  |
| GE004906 |             |                                                               |             |                                  |
| GE000384 | <i>mgtC</i> | Putative Mg <sup>2+</sup> transporter-C (MgtC) family protein | --          |                                  |
| GE001320 |             |                                                               |             |                                  |
| GE004699 | <i>crcB</i> | Fluoride exporter                                             | --          | Fluoride transport               |
| GE004700 |             |                                                               |             |                                  |

**Table S3-** Genes involved in phytohormone production/modulation.

| Gene ID                                                  | Gene        | Annotation                                                       | EC numbers                          | Pathway                                |
|----------------------------------------------------------|-------------|------------------------------------------------------------------|-------------------------------------|----------------------------------------|
| GE003925                                                 | <i>speA</i> | Arginine decarboxylase                                           | --                                  | <b>Putrescine biosynthesis</b>         |
| GE000113<br>GE002997                                     | <i>speB</i> | Agmatinase                                                       | EC:3.5.3.11                         |                                        |
| GE000524                                                 | <i>speH</i> | S-adenosylmethionine decarboxylase                               | EC:4.1.1.50                         | <b>Spermidine biosynthesis</b>         |
| GE000112<br>GE004482                                     | <i>speE</i> | Spermidine synthase                                              | EC:2.5.1.16                         |                                        |
| GE004397                                                 | <i>pat</i>  | Putrescine aminotransferase                                      | EC:2.6.1.82                         | <b>Putrescine degradation</b>          |
| GE003640                                                 | <i>speG</i> | Spermidine/Spermine N (1)-acetyltransferase                      |                                     | <b>Acetyl spermidine formation</b>     |
| GE005012                                                 | <i>potD</i> | Spermidine/putrescine transport system substrate-binding protein | --                                  | <b>Polyamine transport</b>             |
| GE005013                                                 | <i>potC</i> | Spermidine/putrescine transport system permease protein          | --                                  |                                        |
| GE005014                                                 | <i>potB</i> | Spermidine/putrescine transport system permease protein          | --                                  |                                        |
| GE005015                                                 | <i>potA</i> | Spermidine/putrescine transport system ATP-binding protein       | EC:7.6.2.11                         |                                        |
| GE004395<br>GE004784                                     | <i>puuP</i> | Putrescine importer                                              | --                                  |                                        |
| GE000956                                                 | <i>trpB</i> | Tryptophan synthase beta chain                                   | EC:4.2.1.20                         | <b>Tryptophan biosynthetic</b>         |
| GE000957                                                 | <i>trpA</i> | Tryptophan synthase alpha chain                                  | EC:4.2.1.20                         |                                        |
| GE001688                                                 | <i>kynA</i> | Tryptophan 2,3-dioxygenase                                       | EC:1.13.11.1                        | <b>Tryptophan metabolism</b>           |
| GE001883<br>GE002878<br>GE003111<br>GE003378<br>GE003717 | -           | Aldehyde dehydrogenase (NAD+)                                    | EC:1.2.1.3                          | <b>IAA biosynthesis</b>                |
| GE002787                                                 | <i>gadB</i> | Glutamate decarboxylase                                          | EC:4.1.1.15                         | <b>GABA biosynthesis and transport</b> |
| GE001201<br>GE003827                                     | <i>gabD</i> | Succinate-semialdehyde dehydrogenase                             | EC:1.2.1.16<br>1.2.1.79<br>1.2.1.20 |                                        |
| GE002879<br>GE004199<br>GE004319                         | <i>gabT</i> | 4-aminobutyrate aminotransferase                                 | EC:2.6.1.19                         |                                        |
| GE001456<br>GE004499                                     | <i>gabP</i> | GABA permease                                                    | --                                  |                                        |
|                                                          |             |                                                                  |                                     |                                        |

Table S4- Genes involved in vocproduction/degradation.

| Gene ID  | Gene        | Annotation                                                                         | EC numbers                   | Pathway                             |
|----------|-------------|------------------------------------------------------------------------------------|------------------------------|-------------------------------------|
| GE004474 | <i>aldC</i> | Alpha-acetolactate decarboxylase                                                   |                              | <b>Acetoin biosynthesis</b>         |
| GE000582 | <i>alsS</i> | Acetolactate synthase                                                              |                              |                                     |
| GE000583 |             |                                                                                    |                              |                                     |
| GE003566 |             |                                                                                    |                              |                                     |
| GE004310 |             |                                                                                    |                              |                                     |
| GE004473 |             |                                                                                    |                              | <b>Acetoin catabolism</b>           |
| GE000469 | <i>acuA</i> | Acetoin utilization protein AcuC                                                   | --                           |                                     |
| GE000470 | <i>acuB</i> | Acetoin utilization protein AcuB                                                   | --                           |                                     |
|          | <i>acuC</i> |                                                                                    | EC:2.3.1.                    |                                     |
| GE000471 |             | Acetoin utilization protein AcuA                                                   | -                            |                                     |
| GE003389 | <i>acoA</i> | Acetoin:2,6-dichlorophenolindophenol oxidoreductase subunit alpha                  | --                           |                                     |
| GE003388 | <i>acoB</i> | Acetoin:2,6-dichlorophenolindophenol oxidoreductase subunit beta                   | --                           |                                     |
| GE003387 | <i>acoC</i> | Dihydrolipoyllysine-residue acetyltransferase component of acetoin cleaving system | --                           |                                     |
| GE000835 | <i>acoL</i> | Dihydrolipoyl dehydrogenase                                                        | EC:1.8.1.4                   |                                     |
| GE003386 |             |                                                                                    |                              |                                     |
| GE003930 |             |                                                                                    |                              |                                     |
| GE003385 | <i>acoR</i> | Acetoin dehydrogenase operon transcriptional activator AcoR                        | --                           | <b>Butanediol degradation</b>       |
| GE003384 | <i>bdhA</i> | (R,R)-butanediol dehydrogenase                                                     | EC:1.1.1.4 1.1.1.- 1.1.1.303 |                                     |
| GE001552 | <i>dhaT</i> | 1,3-propanediol dehydrogenase                                                      | --                           | <b>1,3-propanediol catabolism</b>   |
| GE002594 |             |                                                                                    |                              | <b>Dimethyl sulfone degradation</b> |
| GE003682 | <i>dmoA</i> | Dimethyl-sulfide monooxygenase                                                     | --                           |                                     |
| GE004390 |             |                                                                                    |                              |                                     |
| GE001930 | <i>sfnG</i> | FMNH(2)-dependent dimethylsulfone monooxygenase                                    | --                           |                                     |

**Table S5 - Genes involved in nitrogen, sulfur, and phosphorus metabolism.**

| Gene ID  | Gene        | Annotation                                                        | EC numbers             | Pathway                                |
|----------|-------------|-------------------------------------------------------------------|------------------------|----------------------------------------|
| GE000658 | <i>pstS</i> | Phosphate transport system substrate-binding protein              | --                     | <b>Phosphate transport</b>             |
| GE000659 | <i>pstC</i> | Phosphate transport system permease protein                       | --                     |                                        |
| GE000660 | <i>pstA</i> | Phosphate transport system permease protein                       | --                     |                                        |
| GE000763 | <i>pstB</i> | Phosphate transport system ATP-binding protein                    | EC:7.3.2.1             |                                        |
| GE003766 | <i>phoA</i> | Alkaline phosphatase                                              | EC:3.1.3.1             | <b>Phosphate assimilation</b>          |
| GE004055 |             |                                                                   |                        |                                        |
| GE000211 | <i>phoD</i> | Alkaline phosphatase D                                            | EC:3.1.3.1             |                                        |
| GE000057 | <i>phoR</i> | Alkaline phosphatase synthesis sensor protein                     | --                     |                                        |
| GE000517 | <i>phoP</i> | Alkaline phosphatase synthesis transcriptional regulatory protein | --                     |                                        |
| GE002287 | <i>ureC</i> | Urease subunit alpha                                              | EC:3.5.1.5             | <b>Urea degradation and transport</b>  |
| GE002286 | <i>ureB</i> | Urease subunit beta                                               | EC:3.5.1.5             |                                        |
| GE002285 | <i>ureA</i> | Urease subunit gamma                                              | EC:3.5.1.5             |                                        |
| GE002293 | <i>ureH</i> | Urease accessory protein UreH                                     | --                     |                                        |
| GE002291 | <i>ureD</i> | Urease accessory protein UreD                                     | --                     |                                        |
| GE002290 | <i>ureG</i> | Urease accessory protein UreG                                     | --                     |                                        |
| GE002289 | <i>ureF</i> | Urease accessory protein UreF                                     | --                     |                                        |
| GE002288 | <i>ureE</i> | Urease accessory protein UreE                                     | --                     |                                        |
| GE000380 | --          | Adenylyl-sulfate kinase                                           |                        | <b>Sulfur metabolic and transport</b>  |
| GE000377 | <i>cysH</i> | Phosphoadenylyl-sulfate reductase                                 | EC:1.8.4.8<br>1.8.4.10 |                                        |
| GE000378 | <i>cysP</i> | Sulfate permease                                                  |                        |                                        |
| GE000379 | <i>sat</i>  | Sulfate adenylyltransferase                                       | EC:2.7.7.4             |                                        |
| GE000380 |             | Adenylylsulfate kinase                                            | EC:2.7.1.25            |                                        |
| GE000566 |             | Sulfonate transport system ATP-binding protein                    | EC:3.6.3.-             |                                        |
| GE000567 |             | Sulfonate transport system substrate-binding protein              |                        |                                        |
| GE000568 |             | Sulfonate transport system permease protein                       |                        |                                        |
| GE002152 | <i>cysJ</i> | Sulfite reductase (NADPH) flavoprotein alpha-component            | EC:1.8.1.2             |                                        |
| GE002153 | <i>cysI</i> | Sulfite reductase (NADPH) hemoprotein beta-component              | EC:1.8.1.2             |                                        |
| GE003131 | <i>cysA</i> | Sulfate/thiosulfate import ATP-binding protein CysA               | EC:7.3.2.3             |                                        |
| GE003132 | <i>cysW</i> | Sulfate transport system permease protein CysW                    | --                     |                                        |
| GE003133 | <i>cysT</i> | Sulfate transport system permease protein CysT                    | --                     |                                        |
| GE003134 | --          | Sulfate/thiosulfate transport system substrate-binding protein    | --                     |                                        |
| GE003291 | --          | Thiosulfate/3-mercaptopyruvate sulfurtransferase                  | EC:2.8.1.1<br>2.8.1.2  |                                        |
| GE000570 |             |                                                                   |                        |                                        |
| GE004388 | --          | Alkanesulfonate monooxygenase                                     | EC:1.14.14.5           |                                        |
| GE000569 | --          | FMN reductase (NADPH)                                             | EC:1.14.14.5           |                                        |
| GE004123 | <i>nirB</i> | Nitrite reductase (NADH) large subunit                            | EC:1.7.1.15            | <b>Dissimilatory nitrate reduction</b> |
| GE004485 |             |                                                                   |                        |                                        |
| GE004122 | <i>nirD</i> | Nitrite reductase (NADH) small subunit                            | EC:1.7.1.15            | <b>Nitrate/nitrite transporter</b>     |
| GE004484 | <i>nasA</i> | Assimilatory nitrate reductase catalytic subunit                  | EC:1.7.99.-            |                                        |
| GE004483 | --          | MFS transporter, NNP family, nitrate/nitrite transporter          | --                     | <b>Ammonia transport</b>               |
| GE004120 | <i>nirC</i> | Nitrite transporter                                               | --                     |                                        |
| GE002618 | <i>amt</i>  | Ammonium transporter, Amt family                                  |                        |                                        |
| GE002330 |             |                                                                   |                        |                                        |
| GE004609 |             |                                                                   |                        |                                        |

**Table S6-** Genes involved in the production of antagonistic traits.

| Gene ID              | Gene        | Annotation                                                 | EC numbers  | Pathway                                    |
|----------------------|-------------|------------------------------------------------------------|-------------|--------------------------------------------|
| GE004479<br>GE005004 | <i>murF</i> | UDP-N-acetylmuramoyl-tripeptide--D-alanyl-D-alanine ligase | EC:6.3.2.10 | Phosphonate biosynthesis                   |
| GE004478             | <i>aepX</i> | Phosphoenolpyruvate phosphomutase                          | --          |                                            |
| GE004477             | <i>aepY</i> | Phosphonopyruvate decarboxylase                            | --          |                                            |
| GE002042             | <i>phnX</i> | Phosphonoacetaldehyde hydrolase                            | --          |                                            |
| GE002043             | <i>phnW</i> | 2-aminoethylphosphonate--pyruvate transaminase             | --          |                                            |
| GE002841             | -           | MBL fold metallo-hydrolase                                 | --          | Phosphonate and phosphinate metabolism     |
| GE001239             | -           | N-acetyltransferase                                        | --          |                                            |
| GE001300             |             |                                                            |             |                                            |
| GE001310             |             |                                                            |             |                                            |
| GE002709             | -           | L-amino acid N-acyltransferase MnaT                        | --          | Alkylresorcinol, alkylpyrones biosynthesis |
| GE001893             | -           | LysR family transcriptional regulator                      | --          |                                            |
| GE001201             | -           | Glutarate-semialdehyde dehydrogenase                       | --          |                                            |
| GE003827             |             | Succinate-semialdehyde dehydrogenase [NADP(+)]             | --          |                                            |
| GE003825             | -           | Type III polyketide synthase, Putative chalcone synthase   | --          |                                            |
| GE003824             | -           | Isoprenylcysteine carboxyl methyltransferase               | --          |                                            |
| GE000624             | -           | GTPase                                                     | --          |                                            |

**Table S7-** Genes involved in iron transport and siderophore production.

| Gene ID                                                                                                  | Gene        | Annotation                                                  | EC numbers | Pathway                |
|----------------------------------------------------------------------------------------------------------|-------------|-------------------------------------------------------------|------------|------------------------|
| GE002693                                                                                                 | <i>fbpB</i> | Iron(III) transport system permease protein                 | --         | Iron(III) transport    |
| GE001268                                                                                                 | <i>fbpC</i> | Fe(3+) ions import ATP-binding protein FbpC                 | --         |                        |
| GE004363                                                                                                 | <i>feoA</i> | Ferrous iron transport protein A                            | --         | Iron(II) transport     |
| GE001714<br>GE004364<br>GE001713                                                                         | <i>feoB</i> | Ferrous iron transport protein B                            | --         |                        |
| GE000291<br>GE002064<br>GE002802<br>GE003268<br>GE003753<br>GE004386                                     | <i>fhuD</i> | Iron complex transport system substrate-binding protein     | --         | Iron complex transport |
| GE000292<br>GE000293<br>GE002061<br>GE002062<br>GE002313<br>GE003754<br>GE003755<br>GE004384<br>GE004385 | <i>fhuB</i> | Iron complex transport system permease protein              | --         |                        |
| GE000294<br>GE002063<br>GE002314<br>GE003078                                                             | <i>fhuC</i> | Iron complex transport system ATP-binding protein           | EC:7.2.2.- |                        |
| GE001213<br>GE004878                                                                                     | <i>rhbD</i> | Lysine 6-monooxygenase                                      | --         |                        |
| GE001211                                                                                                 | <i>rhbC</i> | Siderophore biosynthesis protein RhbC                       | --         |                        |
| GE001213<br>GE004878                                                                                     | <i>rhbE</i> | Siderophore biosynthesis protein RhbE                       | --         |                        |
| GE001215                                                                                                 | <i>rhbF</i> | Siderophore biosynthesis protein RhbF                       | --         |                        |
| GE000292                                                                                                 | <i>yfiZ</i> | Probable siderophore transport system permease protein YfhZ | --         | Siderophore transport  |
| GE000293                                                                                                 | <i>yfhA</i> | Probable siderophore transport system permease protein YfhA | --         |                        |
| GE000291                                                                                                 | <i>yfiY</i> | Probable siderophore-binding lipoprotein YfiY               | --         |                        |



**Table S8- Genes involved in chemotaxis and motility.**

| Gene ID              | Gene             | Annotation                                                        | EC numbers              | Pathway            |
|----------------------|------------------|-------------------------------------------------------------------|-------------------------|--------------------|
| GE001106<br>GE003735 | <i>CheA</i>      | Two-component system, chemotaxis family, sensor kinase CheA       | EC:2.7.13.3             | Chemotaxis         |
| GE001107             | <i>CheW</i>      | Purine-binding chemotaxis protein CheW                            | --                      |                    |
| GE001108             | <i>CheD</i>      | Chemotaxis protein CheD                                           | EC:3.5.1.44             |                    |
| GE000949<br>GE003734 | <i>CheR</i>      | Chemotaxis protein methyltransferase CheR                         | EC:2.1.1.80             |                    |
| GE001105<br>GE002970 | <i>CheB</i>      | Two-component system, chemotaxis family, CheB/CheR fusion protein | EC:2.1.1.80<br>3.1.1.61 |                    |
| GE001096             | <i>CheY</i>      | Two-component system, chemotaxis family, chemotaxis protein CheY  | --                      |                    |
| GE003963             | <i>CheV</i>      | Two-component system, chemotaxis family, chemotaxis protein CheV  | --                      |                    |
| GE000467<br>GE003218 | <i>MotA</i>      | Chemotaxis protein MotA                                           | --                      |                    |
| GE000468<br>GE003217 | <i>MotB</i>      | Chemotaxis protein MotB                                           | --                      |                    |
| GE002775<br>GE004721 | <i>Mcp</i>       | Methyl-accepting chemotaxis protein                               | EC:4.1.1.15             |                    |
| GE001385             | <i>HemAT</i>     | Heme-based aerotactic transducer                                  | -                       |                    |
| GE001102             | <i>FlhA</i>      | Flagellar biosynthesis protein FlhA                               | --                      | Flagellar assembly |
| GE001109             | <i>FliA</i>      | RNA polymerase sigma factor for flagellar operon FliA             | --                      |                    |
| GE001080             | <i>FlgB</i>      | Flagellar basal-body rod protein FlgB                             | --                      |                    |
| GE001101             | <i>FlhB</i>      | Flagellar biosynthetic protein FlhB                               | --                      |                    |
| GE001081             | <i>FlgC</i>      | Flagellar basal-body rod protein FlgC                             | --                      |                    |
| GE004169             | <i>FliC</i>      | Flagellin                                                         |                         |                    |
| GE001090             | <i>FlgD</i>      | Flagellar basal-body rod modification protein FlgD                | --                      |                    |
| GE001092             | <i>FliB</i>      | Flagellar protein FliB; Swarming motility protein SwrD            | --                      |                    |
| GE001082             | <i>FliE</i>      | Flagellar hook-basal body complex protein FliE                    | --                      |                    |
| GE001091             | <i>FlgE</i>      | Flagellar hook protein FlgE                                       | --                      |                    |
| GE001083             | <i>FliF</i>      | Flagellar M-ring protein FliF                                     | --                      |                    |
| GE001103             | <i>FlhF</i>      | Flagellar biosynthesis protein FlhF                               |                         |                    |
| GE000165<br>GE000166 | <i>FlgG</i>      | Flagellar basal-body rod protein FlgG                             | --                      |                    |
| GE000186             | <i>FliS</i>      | Flagellar protein FliS                                            |                         |                    |
| GE001084             | <i>FliG</i>      | Flagellar motor switch protein FliG                               |                         |                    |
| GE001104             | <i>FlhG</i>      | Flagellar biosynthesis protein FlhG                               |                         |                    |
| GE001085             | <i>FliH</i>      | Flagellar assembly protein FliH                                   |                         |                    |
| GE001087             | <i>FliJ</i>      | Flagellar FliJ protein                                            |                         |                    |
| GE000194             | <i>FlgK</i>      | Flagellar hook-associated protein 1 FlgK                          |                         |                    |
| GE000195             | <i>FlgL</i>      | Flagellar hook-associated protein 3 FlgL                          |                         |                    |
| GE001093             | <i>FliL</i>      | Flagellar FliL protein                                            |                         |                    |
| GE001094             | <i>FliM</i>      | Flagellar motor switch protein FliM                               |                         |                    |
| GE001095             | <i>FliN/FliY</i> | Flagellar motor switch protein FliN/FliY                          |                         |                    |
| GE001097             | <i>FliO/FliZ</i> | Flagellar protein FliO/FliZ                                       |                         |                    |
| GE001098             | <i>FliP</i>      | Flagellar biosynthetic protein FliP                               |                         |                    |
| GE001099             | <i>FliQ</i>      | Flagellar biosynthetic protein FliQ                               |                         |                    |
| GE001100             | <i>FliR</i>      | Flagellar biosynthetic protein FliR                               |                         |                    |
| GE000205             | <i>FliS</i>      | Flagellar protein FliS                                            |                         |                    |
| GE000206             | <i>FliT</i>      | Flagellar protein FliT                                            |                         |                    |
| GE000196             | <i>FliW</i>      | Flagellar assembly factor FliW                                    |                         |                    |
| GE000204             | <i>FliD</i>      | Flagellar hook-associated protein 2                               |                         |                    |
| GE001086             | <i>FliS</i>      | Flagellum-specific ATP synthase                                   | EC:7.4.2.8              |                    |
| GE001089             | <i>FliK</i>      | Flagellar hook-length control protein FliK                        |                         |                    |

**Table S9.** Effect of strain ZS-3 on aboveground and underground biomass of *C. camphora*

| Group  | Aboveground      |                | Underground      |                |
|--------|------------------|----------------|------------------|----------------|
|        | Fresh weight (g) | Dry weight (g) | Fresh weight (g) | Dry weight (g) |
| S-CK   | 8.37±0.78b       | 3.57±0.19c     | 5.03±0.26b       | 2.70±0.39b     |
| S-ZS-3 | 15.69±1.52a      | 7.34±0.89a     | 11.2±2.54a       | 5.73±1.33a     |
| N-CK   | 9.27±0.67b       | 3.92±0.45c     | 5.26±0.64b       | 3.25±0.24b     |
| N-ZS-3 | 13.67±1.44a      | 5.52±0.63b     | 9.27±0.78a       | 5.28±0.51a     |

Note: Results are the mean ± standard deviation from 15 independent experiments. Different lowercase letters above the bars represent significant differences based on one-way ANOVA ( $P < 0.05$ ). The four treatment groups were as follows: (1) S-CK: saline soil inoculated with ddH<sub>2</sub>O; (2) S-ZS-3: saline soil inoculated with ZS-3; (3) N-CK: neutral soil inoculated with ddH<sub>2</sub>O; and (4) N-ZS-3 neutral soil inoculated with ZS-3.

**Table S10.** Effect of strain ZS-3 on root development of *C. camphora*

| Group  | Total root length/cm | Root surface area/cm <sup>2</sup> | Root volume/cm <sup>3</sup> | Root tip number/individual | Bifurcation Number/individual |
|--------|----------------------|-----------------------------------|-----------------------------|----------------------------|-------------------------------|
| S-CK   | 113.09±12.56<br>c    | 173.29±18.28<br>c                 | 19.60±1.31c                 | 2851.67±123b               | 4182.33±127.97d               |
| S-ZS-3 | 185.92±10.92<br>a    | 379.41±31.08<br>a                 | 37.80±2.99a                 | 3398±210.23a               | 12398.67±1164.30a             |
| N-CK   | 141.20±10.38<br>b    | 148.29±10.33<br>c                 | 23.53±3.98c                 | 2878±349.69b               | 6123±290.10c                  |
| N-ZS-3 | 157.55±9.677<br>b    | 280.68±22.64<br>b                 | 28.95±2.09b                 | 3126±306.99a<br>b          | 9226±912.69b                  |

Note: Results are the mean ± standard deviation from 15 independent experiments. Different lowercase letters above the bars represent significant differences based on one-way ANOVA ( $P < 0.05$ ). The four treatment groups were as follows: (1) S-CK: saline soil inoculated with ddH<sub>2</sub>O; (2) S-ZS-3: saline soil inoculated with ZS-3; (3) N-CK: neutral soil inoculated with ddH<sub>2</sub>O; and (4) N-ZS-3 neutral soil inoculated with ZS-3.
